# Supplementary material for: Exome Sequencing of Index Patients with Retinal Dystrophies as a Tool for Molecular Diagnosis
Source: PubMed Central journal article supplement (PMC3683009; doi:10.1371/journal.pone.0065574), 2013-06-14
Supplement: pone.0065574.s001.pdf [file pone.0065574.s001.pdf]

**Supplementary Table S1.** PCR primers used in this study

| Exon                 | Forward Primer (5'-3')  | Reverse Primer (5'-3')  | PCR Annealing Temperature (°C) | Product Size (bp) |
|----------------------|-------------------------|-------------------------|--------------------------------|-------------------|
| <b><i>ABCA4</i></b>  |                         |                         |                                |                   |
| Ex 3                 | CCTGCTTGGTCTCCATGAC     | ACGTGAAGGGGTGTGCAAC     | 57                             | 249               |
| Ex 8                 | GAGCATTGGCCTCACAGCAG    | CCCCAGGTTTGGTTTCACC     | 54                             | 400               |
| Ex 15                | AGGCTGGTGGGAGAGAGC      | GGACTGCTACGGACCATTC     | 56                             | 373               |
| Ex 33                | TTCATGTTTCCCTACAAAACCC  | AAAATCCTACTCAAATCTCCAG  | 58                             | 228               |
| Ex 45                | CTTGTCTTCTCCAAATGGCA    | TTTAAGCCCTTGGTGCGGC     | 51                             | 208               |
| <b><i>CHM</i></b>    |                         |                         |                                |                   |
| Ex 7                 | AGTTATATCATTAGGAAGCAG   | TTGGAGAGCACTACTTAATG    | 55                             | 203               |
| <b><i>CNGB3</i></b>  |                         |                         |                                |                   |
| Ex 10                | AAGGGGTTGCTGGTGAC       | CATTGAATGGGTTATGACAGC   | 60                             | 330               |
| Ex 15                | TTTCACATGATATGTTCAACCC  | CTTTTCCTTAGGTCGCTTTGG   | 60                             | 119               |
| <b><i>NMNAT1</i></b> |                         |                         |                                |                   |
| Ex 5.1               | AAAGTAAACCCCTTCCACTTG   | ACCAAGTAGCGAATGCTCTG    | 58                             | 358               |
| Ex 5.2               | TATGAATCGGATGTGCTGTG    | TGTGCCAGACGATTTTTAC     | 54                             | 384               |
| <b><i>RP1</i></b>    |                         |                         |                                |                   |
| Ex 4.3               | CTGTGATTGGCAGTGTGACC    | TGCATCTGCTGAAATAGGACTG  | 60                             | 425               |
| Ex 4.12              | CATTTCAGAATTGGAATCTTTTG | CTCTTGGGTAAGTTCGCCAC    | 60                             | 478               |
| Ex 4.14              | CAGGAATTCAGGAGGAAAG     | CAGGTTTCATTGCGAACATC    | 60                             | 446               |
| <b><i>USH2A</i></b>  |                         |                         |                                |                   |
| Ex 11                | TGGCAGGTAGAGATGAAAGG    | GCAAATGCAGTCTTCAATTCATC | 55                             | 371               |
| Ex 52                | TGGGAAGCTGCAAAACTG      | GGCCTCAAAGTATGATGGAATG  | 55                             | 564               |
