# Supplementary material for: Exome Sequencing of Index Patients with Retinal Dystrophies as a Tool for Molecular Diagnosis
Source: PubMed Central journal article supplement (PMC3683009; doi:10.1371/journal.pone.0065574), 2013-06-14
Supplement: pone.0065574.s003.pdf [file pone.0065574.s003.pdf]

**Supplementary Table S3.** Number of variants identified in patients after each filtering process

| Family ID          | Patient ID | Pre-filtering<br>Total variants | Step 1<br>Nonsynonymous | Step 2<br>In 160 RD genes | Step 3<br>MAF < 2%* | Step 4<br>2 Alleles† | Step 5<br>Annotation |
|--------------------|------------|---------------------------------|-------------------------|---------------------------|---------------------|----------------------|----------------------|
| RP-0674            | 01/0570    | 66145                           | 12223                   | 142                       | 24                  | 9                    | 2                    |
| RP-0298            | 95/0103    | 67509                           | 12238                   | 112                       | 27                  | 6                    | 2                    |
| RP-1102            | 07/0366    | 63727                           | 11866                   | 143                       | 26                  | 10                   | 1                    |
| RP-0235            | 2343       | 70262                           | 12154                   | 108                       | 34                  | 12                   | 1                    |
| RP-0137            | 1601       | 64148                           | 12021                   | 124                       | 18                  | 8                    | 2                    |
| RP1659             | 10/1367    | 69980                           | 12559                   | 125                       | 28                  | 8                    | 2                    |
| RP-1174            | 04/0834    | 67727                           | 12147                   | 124                       | 25                  | 10                   | 4                    |
| RP-1164            | 07/0360    | 64333                           | 12119                   | 142                       | 28                  | 7                    | 1                    |
| RP-1116            | 06/1075    | 67962                           | 12110                   | 143                       | 32                  | 13                   | 2                    |
| RP-1263            | 08/08177   | 67370                           | 12390                   | 112                       | 21                  | 2                    | 2                    |
| RP-0886            | 04/0872    | 67814                           | 12139                   | 108                       | 21                  | 3                    | 0                    |
| RP-0461            | 05/0771    | 64652                           | 11935                   | 125                       | 21                  | 9                    | 0                    |
| Average            |            | 66802                           | 12158                   | 126                       | 25                  | 8.1                  | 1.6                  |
| Standard deviation |            | 2211                            | 187                     | 14                        | 4.8                 | 3.3                  | 1.1                  |

Numbers of unique variations in the genome, regardless of their number of copies, are presented (both a homozygous and a heterozygous DNA variant at a given genomic position and of a given type is considered as a single variation).

\* Annotation is based on dbSNP build 130.

† For a male patient, a single mutant allele on the X chromosome is also included.
